# Supplementary material for: The effect of chronic and acute stressors, and their interaction, on testes function: an experimental test during testicular recrudescence
Source: Oxford University Press journal article supplement (doi:10.1242/jeb.180869), 2018-09-01
Supplement: jeb180869supp.pdf [file jeb180869supp.pdf]

**Table S1:** qPCR 1 primer sequences, design and efficiencies. WTSP = White throated sparrow (*Zonotrichia albicollis*); ZF = Zebra finch (*Taeniopygia guttata*).

| Gene         | Primer     | Sequence                                                   | Reference                 | Genome  | Product length | Efficiency |
|--------------|------------|------------------------------------------------------------|---------------------------|---------|----------------|------------|
| <i>FSHR</i>  | FWD<br>REV | ACGCCACCGAGCTGAGATTTGT<br>TCAACAAGTCCTGTGAAAGCTCCCT        | Designed by CMBB          | WTSP    | 73             | 1.996      |
| <i>RPL4</i>  | FWD<br>REV | GTCTAAAGGCCACCGCATTGA<br>CGCTGGGAGGCGTAAACCTT              | Designed by CMBB          | WTSP    | 150            | 1.996      |
| <i>PPIA</i>  | FWD<br>REV | TCCGAAGACAGCAGAAAACT<br>CCATTGTGGCGTGTGAAGTC               | Designed by CMBB          | WTSP    | 130            | 1.954      |
| <i>GR</i>    | FWD<br>REV | TGAAGAGCCAGTCCCTGTTTCGAG<br>CAACCACATCATGCATAGAGTCCAGCA    | Rosvall et al. 2016b      | see ref | see ref        | 1.985      |
| <i>MR</i>    | FWD<br>REV | AAGAGTCGGCCAAACATCCTTGTCT<br>AAGAAACGGGTGGTCCTAAAATCCCAG   | Rosvall et al. 2016b      | see ref | see ref        | 1.998      |
| <i>GnlHR</i> | FWD<br>REV | TGGCCCTTTGACAACATCACGTGCAA<br>ACAGCAATGGCGACCAGCGTGAAA     | Rosvall et al. 2016b      | see ref | see ref        | 2.034      |
| <i>LHR</i>   | FWD<br>REV | TTCAGAGCGACTCCCTG,<br>TCCGTCTCAATGTGCAAC                   | Burgeon-Burns et al. 2014 | see ref | see ref        | 1.994      |
| <i>StAR</i>  | FWD<br>REV | TGGGCCAGCACATGCTAGTTAAGCAA<br>AGCAGGGCTTCCTTCAGGAACCAAGTAT | Rosvall et al. 2016a      | see ref | see ref        | 1.983      |
| <i>P450</i>  | FWD<br>REV | GACCGCGAGAAGATGCTGAAA<br>TTCCTTGATGGTGGCCTTGAG             | Rosvall et al. 2016a      | see ref | see ref        | 2.045      |
| <i>CYP17</i> | FWD<br>REV | CATCAACCTCTGGTCTGTGCAC<br>AAGCGGCCAGGATTGAACT              | Rosvall et al. 2016a      | see ref | see ref        | 1.93       |
| <i>3βHSD</i> | FWD<br>REV | ATGAGCTACGCTGACCTGAA<br>CAGCAGCAGCGAGAAGTAATAG             | Rosvall et al. 2016a      | see ref | see ref        | 2.016      |

**Table S2:** Change in baseline testosterone over the course of experiment. SE = standard error. Interaction (in italic font) was not significant and was taken out of the final model.**Linear mixed model**

| Fixed variable                                            | Estimate      | SE           | t             | p                | Sample size                |          |
|-----------------------------------------------------------|---------------|--------------|---------------|------------------|----------------------------|----------|
| Sampling round (after vs before)                          | 0.401         | 0.077        | 5.219         | <b>&lt;0.001</b> | <b>Group</b>               | <b>n</b> |
| Long-term treatment (disturbance)                         | -0.373        | 0.183        | -2.038        | <b>0.049</b>     | Before long-term treatment | 24       |
| <i>Sampling round x Long-term treatment (disturbance)</i> | <i>-0.195</i> | <i>0.150</i> | <i>-1.301</i> | <i>0.210</i>     | After long-term treatment  | 33       |

**Table S3:** Effect of disturbance treatment on change in testosterone in response to handling.  
SE = standard error.

| <b>Linear mixed model</b>                                     |                 |           |          |              | <b>Sample size</b>                           |          |
|---------------------------------------------------------------|-----------------|-----------|----------|--------------|----------------------------------------------|----------|
| <b>Fixed variable</b>                                         | <b>Estimate</b> | <b>SE</b> | <b>t</b> | <b>p</b>     | <b>Group</b>                                 | <b>n</b> |
| Acute stressor (handling)                                     | -0.702          | 0.207     | -3.395   | <b>0.003</b> | Long-term control, unhandled baseline        | 16       |
| Long-term treatment (disturbance)                             | -0.714          | 0.251     | -2.846   | <b>0.008</b> | Long-term control, acute handling stress     | 14       |
| Acute stressor (handling) x long-term treatment (disturbance) | 0.669           | 0.296     | 2.265    | <b>0.034</b> | Long-term disturbance, unhandled baseline    | 17       |
|                                                               |                 |           |          |              | Long-term disturbance, acute handling stress | 12       |

**Table S4:** Effect of disturbance treatment on testosterone increase in response to GnRH injection. SE = standard error. Interaction (in italic font) was not significant and was taken out of the final model.

| <b>Linear mixed model</b>                                 |                 |              |              |                  | <b>Sample size</b>                    |          |
|-----------------------------------------------------------|-----------------|--------------|--------------|------------------|---------------------------------------|----------|
| <b>Fixed variable</b>                                     | <b>Estimate</b> | <b>SE</b>    | <b>t</b>     | <b>p</b>         | <b>Group</b>                          | <b>n</b> |
| GnRH injection                                            | 1.941           | 0.214        | 9.077        | <b>&lt;0.001</b> | Long-term control, pre-injection      | 14       |
| Long-term treatment (disturbance)                         | 0.016           | 0.266        | 0.059        | 0.953            | Long-term control, post-injection     | 16       |
| <i>GnRH injection x Long-term treatment (disturbance)</i> | <i>0.016</i>    | <i>0.435</i> | <i>0.037</i> | <i>0.971</i>     | Long-term disturbance, pre-injection  | 12       |
|                                                           |                 |              |              |                  | Long-term disturbance, post-injection | 18       |

**Table S5:** Relationship between baseline testosterone and testes mass. SE = standard error. Interactions that were not significant (in italic font) were taken out of the final model.

| Linear model                                           |               |               |              |              | Sample size           |    |
|--------------------------------------------------------|---------------|---------------|--------------|--------------|-----------------------|----|
| Variable                                               | Estimate      | SE            | t            | p            | Group                 | n  |
| Baseline testosterone                                  |               |               |              |              |                       |    |
| Testes mass                                            | 7.120         | 7.500         | 0.949        | 0.352        | Long-term control     | 13 |
| Long-term treatment (disturbance)                      | -0.513        | 0.255         | -2.010       | 0.056        | Long-term disturbance | 14 |
| Time of sampling                                       | 0.004         | 0.002         | 2.692        | <b>0.013</b> |                       |    |
| <i>Testes mass x Long-term treatment (disturbance)</i> | <i>22.128</i> | <i>14.623</i> | <i>1.513</i> | <i>0.144</i> |                       |    |
| Post-handling testosterone                             |               |               |              |              |                       |    |
| Testes mass                                            | 12.393        | 4.367         | 2.838        | <b>0.010</b> | Long-term control     | 13 |
| Long-term treatment (disturbance)                      | 0.051         | 0.153         | 0.333        | 0.742        | Long-term disturbance | 12 |
| <i>Testes mass x Long-term treatment (disturbance)</i> | <i>1.311</i>  | <i>8.935</i>  | <i>0.147</i> | <i>0.885</i> |                       |    |
| GnRH-induced testosterone                              |               |               |              |              |                       |    |
| Testes mass                                            | 34.627        | 11.072        | 3.127        | <b>0.004</b> | Long-term control     | 12 |
| Long-term treatment (disturbance)                      | -0.189        | 0.364         | -0.518       | 0.608        | Long-term disturbance | 14 |
| <i>Testes mass x Long-term treatment (disturbance)</i> | <i>23.579</i> | <i>22.439</i> | <i>1.051</i> | <i>0.302</i> |                       |    |

**Table S6.** Significantly differentially expressed genes in response to chronic disturbance treatment (excel file available separately).

[Click here to Download Table S6](#)

**Table S7.** Significantly differentially expressed genes in response to acute handling treatment (excel file available separately).

[Click here to Download Table S7](#)

**Table S8.** Correlation coefficients between genes involved in steroidogenesis. Coefficients are below the diagonal, p-values are above the diagonal.

| Gene                          | <i>LHR</i> | <i>StAR</i> | <i>P450</i> | <i>CYP17</i> | <i>3<math>\beta</math>HSD</i> |
|-------------------------------|------------|-------------|-------------|--------------|-------------------------------|
| <i>LHR</i>                    |            | 0.004       | 0.251       | 0.024        | 0.438                         |
| <i>StAR</i>                   | 0.48       |             | 0.002       | 0.017        | 0.121                         |
| <i>P450</i>                   | 0.20       | 0.50        |             | 0.001        | 0.001                         |
| <i>CYP17</i>                  | 0.38       | 0.40        | 0.54        |              | 0.301                         |
| <i>3<math>\beta</math>HSD</i> | 0.14       | 0.27        | 0.56        | 0.18         |                               |

**Table S9.** Variance and loadings of principal components for genes involved in testosterone synthesis

|                                  | <b>PC1</b>      | <b>PC2</b> | <b>PC3</b> | <b>PC4</b> | <b>PC5</b> |
|----------------------------------|-----------------|------------|------------|------------|------------|
| Proportion of variance explained | 0.498           | 0.209      | 0.138      | 0.103      | 0.052      |
| Standard deviation               | 1.578           | 1.021      | 0.831      | 0.719      | 0.508      |
| <i>Genes</i>                     | <i>Loadings</i> |            |            |            |            |
| <i>LHR</i>                       | -0.377          | 0.601      | -0.437     | 0.474      | -0.285     |
| <i>StAR</i>                      | -0.486          | 0.234      | -0.260     | -0.741     | 0.304      |
| <i>P450</i>                      | -0.520          | -0.370     | 0.241      | -0.154     | -0.715     |
| <i>CYP17</i>                     | -0.461          | 0.195      | 0.707      | 0.285      | 0.411      |
| <i>3<math>\beta</math>HSD</i>    | -0.372          | -0.640     | 0.429      | 0.349      | 0.382      |



**Table S10.** Variance and loadings of principal components for genes involved in testosterone synthesis from animals in the control treatment only.

|                                  | <b>PC1</b>      | <b>PC2</b> | <b>PC3</b> | <b>PC4</b> | <b>PC5</b> |
|----------------------------------|-----------------|------------|------------|------------|------------|
| Proportion of variance explained | 0.411           | 0.213      | 0.195      | 0.124      | 0.057      |
| Standard deviation               | 1.434           | 1.033      | 0.987      | 0.787      | 0.532      |
| <i>Genes</i>                     | <i>Loadings</i> |            |            |            |            |
| <i>LHR</i>                       | -0.486          | 0.612      |            |            | 0.619      |
| <i>StAR</i>                      | -0.536          | 0.240      | 0.422      | -0.342     | -0.600     |
| <i>P450</i>                      | -0.394          | -0.657     |            | -0.541     | 0.337      |
| <i>CYP17</i>                     | -0.351          |            | -0.841     | 0.166      | -0.376     |
| <i>3βHSD</i>                     | -0.445          | -0.370     | 0.317      | 0.750      |            |

**Table S11.** Effect of acute handling treatment on steroidogenesis gene expression in birds from the long-term control treatment (acute handling treatment n=8; unhandled controls n=9). Positive coefficient indicates higher gene expression in unhandled birds. SE = standard error

| Gene                          | n  | Coefficient | SE    | t     | p value | adjusted p value |
|-------------------------------|----|-------------|-------|-------|---------|------------------|
| <i>LHR</i>                    | 17 | 0.202       | 0.142 | 1.424 | 0.175   | 0.438            |
| <i>StAR</i>                   | 17 | 0.132       | 0.170 | 0.777 | 0.449   | 0.562            |
| <i>P450</i>                   | 17 | 0.117       | 0.200 | 0.583 | 0.568   | 0.568            |
| <i>CYP17</i>                  | 17 | 0.163       | 0.077 | 2.102 | 0.053   | 0.265            |
| <i>3<math>\beta</math>HSD</i> | 17 | 0.133       | 0.131 | 1.015 | 0.326   | 0.544            |

**Table S12.** Effect of chronic and acute handling treatment of *GR*, *MR*, and *GnIHR* (sample sizes: chronic disturbance & acute handling n=9; chronic disturbance & unhandled control n=9; chronic control & acute handling n=9; chronic control & unhandled control n=8). SE = standard error. Interactions that were not significant (in italic font) were taken out of the final model.

| Fixed effect                     | coefficient   | SE           | t             | p value      | adjusted p value |
|----------------------------------|---------------|--------------|---------------|--------------|------------------|
| <i>GR</i>                        |               |              |               |              |                  |
| Chronic treatment (disturbance)  | -0.057        | 0.060        | -0.956        | 0.346        | 0.5192           |
| Acute treatment (unhandled)      | 0.137         | 0.060        | 2.282         | 0.029        | 0.0879           |
| <i>Chronic x acute treatment</i> | <i>0.006</i>  | <i>0.122</i> | <i>0.050</i>  | <i>0.960</i> | <i>na</i>        |
| <i>MR</i>                        |               |              |               |              |                  |
| Chronic treatment (disturbance)  | -0.067        | 0.066        | -1.022        | 0.315        | 0.5192           |
| Acute treatment (unhandled)      | 0.037         | 0.066        | 0.556         | 0.582        | 0.5822           |
| <i>Chronic x acute treatment</i> | <i>-0.127</i> | <i>0.132</i> | <i>-0.963</i> | <i>0.343</i> | <i>na</i>        |
| <i>GnIHR</i>                     |               |              |               |              |                  |
| Chronic treatment (disturbance)  | 0.058         | 0.140        | 0.413         | 0.682        | 0.6822           |
| Acute treatment (unhandled)      | -0.262        | 0.140        | -1.875        | 0.070        | 0.1049           |
| <i>Chronic x acute treatment</i> | <i>0.418</i>  | <i>0.274</i> | <i>1.524</i>  | <i>0.138</i> | <i>na</i>        |

**Figure S1:** Effect of chronic disturbance and acute handling stressor on the expression of genes involved in steroidogenesis; A) *LHR*, B) *StAR*, C) *P450*, D) *CYP17*, E) *3 $\beta$ HSD*. Shown are group means (open circles) +/- standard error; points represent individual measurements.

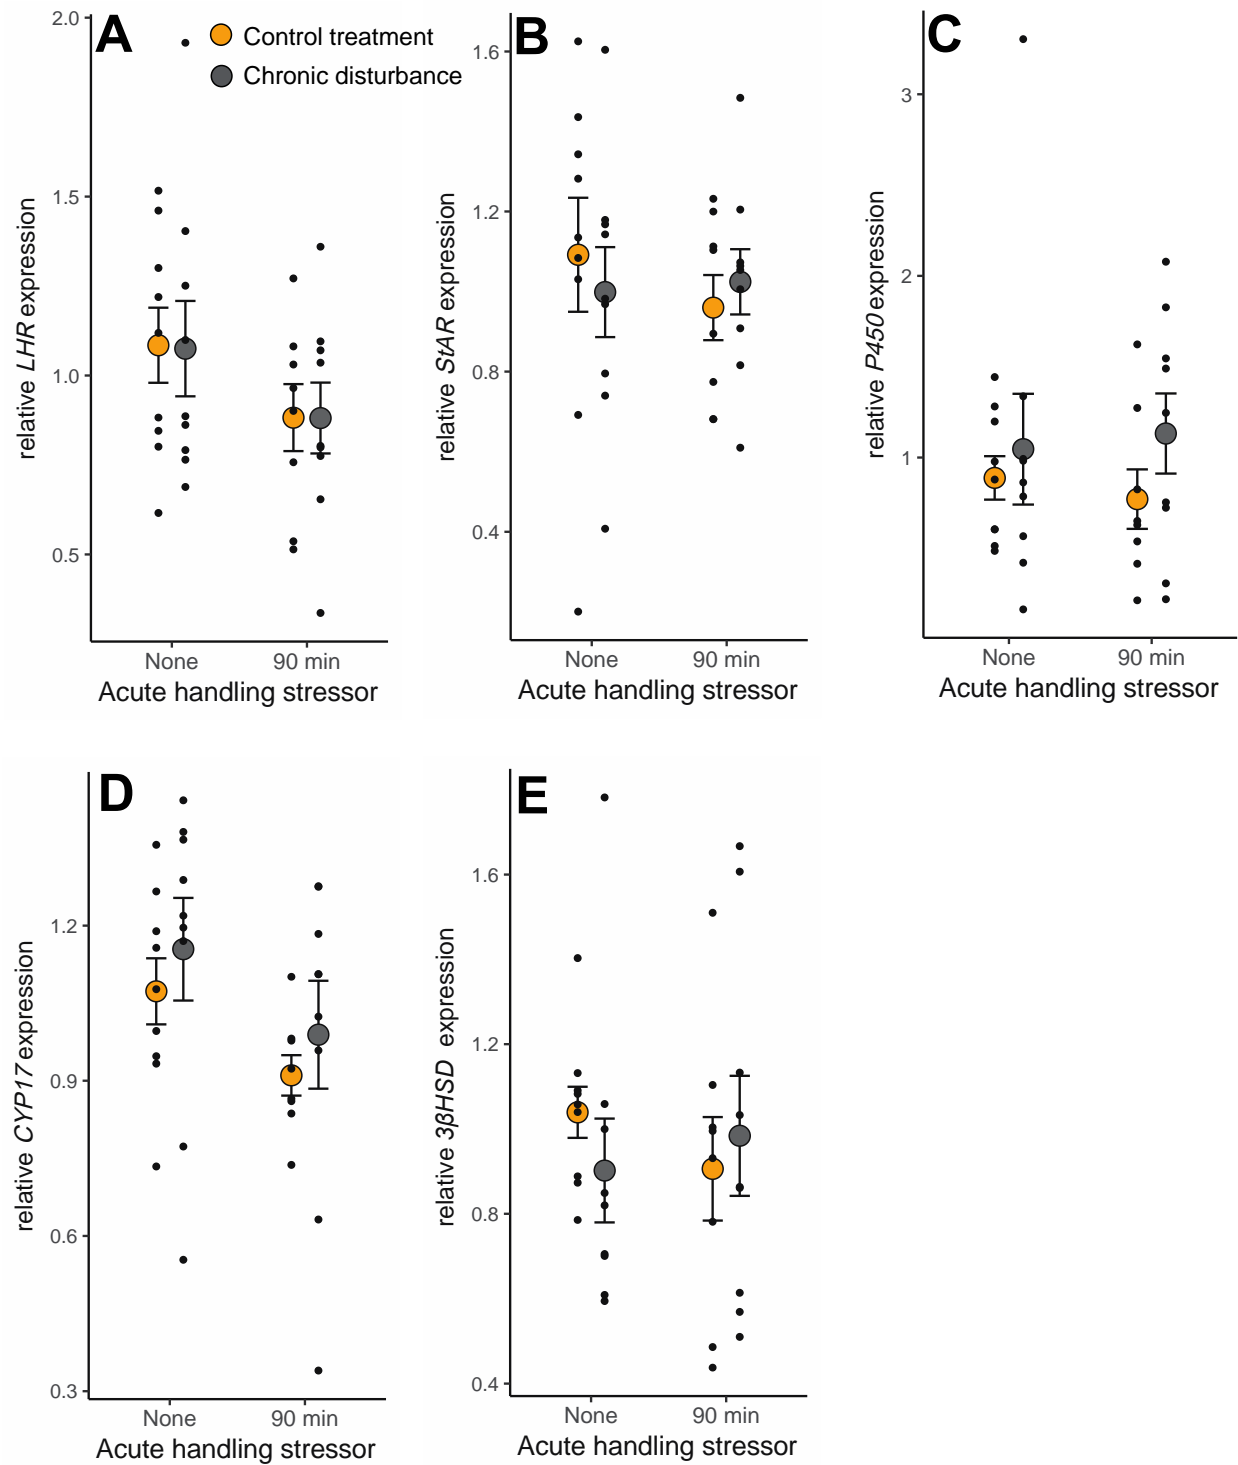

**Figure S2:** Effect of chronic disturbance and acute handling stressor on the expression of *FSHR*. Shown are group means (open circles) +/- standard error; points represent individual measurements.

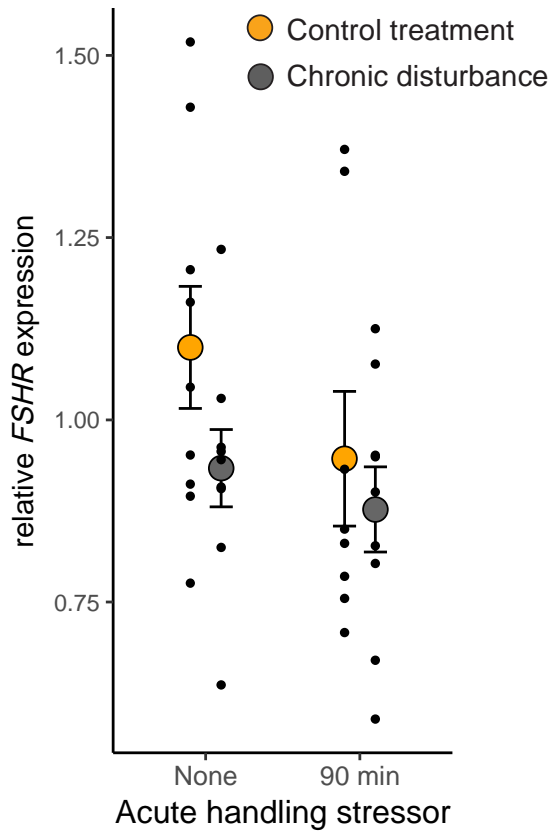

### **Literature cited**

- Bergeon Burns, C. M., K. a Rosvall, T. P. Hahn, G. E. Demas, and E. D. Ketterson. 2014. Examining sources of variation in HPG axis function among individuals and populations of the dark-eyed junco. *Hormones and behavior* 65:179–87.
- Rosvall, K. A., C. M. Bergeon Burns, S. P. Jayaratna, and E. D. Ketterson. 2016a. Divergence along the gonadal steroidogenic pathway: Implications for hormone-mediated phenotypic evolution. *Hormones and Behavior* 84:1–8.
- Rosvall, K. A., C. M. B. Burns, S. P. Jayaratna, E. K. Dossey, and E. D. Ketterson. 2016b. Gonads and the evolution of hormonal phenotypes. *Integrative and comparative biology* 56:225–234.
